# Supplementary material for: Sargachromenol Isolated from Sargassum horneri Attenuates Glutamate-Induced Neuronal Cell Death and Oxidative Stress through Inhibition of MAPK/NF-κB and Activation of Nrf2/HO-1 Signaling Pathway
Source: MDPI journal article supplement (doi:10.3390/md20110710), 2022-11-12
Supplement: s1 [file s1]

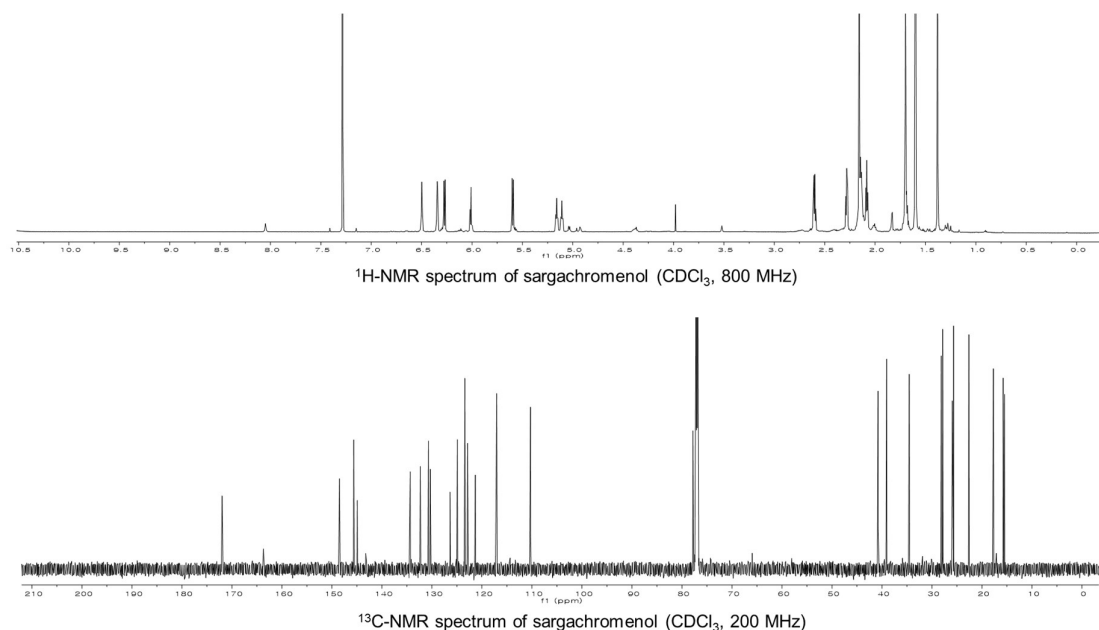

(a)

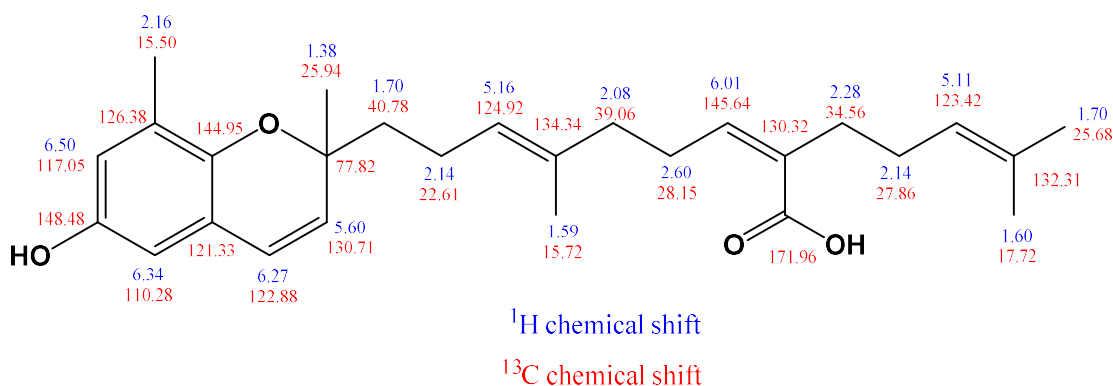

(b)

**Supplementary figure S1. <sup>1</sup>H and <sup>13</sup>C NMR spectrum (a) and chemical shift (b) of sargachromenol.** The <sup>1</sup>H NMR spectrum of sargachromenol exhibited resonances for two ortho-coupled aromatic protons (δH 6.27 and 5.60), two meta-coupled aromatic protons (δH 6.50 and 6.34), three olefinic protons (δH 6.01, 5.16, and 5.11), six sets of methylene protons (δH 2.60, 2.28, 2.15, 2.14, 2.08, and 1.70), and five methyl protons (δH 2.16, 1.70, 1.60, 1.59, and 1.38). The <sup>13</sup>C NMR spectrum of sargachromenol showed resonances for a carbonyl carbon (δC 171.9), a phenolic carbon (δC 148.4), four aromatic methine carbons (δC 130.7, 122.8, 117.0, and 110.2), three methinyl vinylic carbons (δC 145.6, 124.9, and 123.4), seven nonprotonated carbons (δC 144.9, 134.3, 132.3, 130.7, 130.3, 126.3, and 121.3), six methylene carbons (δC 40.7, 39.0, 34.5, 28.1, 27.8, and 22.6), and five methyl carbons (δC 25.9, 25.6, 17.7, 15.7, and 15.5).
